# Supplementary material
Source: MDPI journal article supplement (https://www.mdpi.com/search?q=molbank-2021-M1277)
Supplement: s002 [file molbank-2021-M1277-s002-mod.mol]

diMeOBnBr 1 copy.mol
  corina  09072114453D 1   1.00000     0.00000 
CORINA 4.3.0 0026  30.10.2019
 12 12  0  0  0  0  0  0  0  0999 V2000
    1.1757    2.0893    0.0021 C   0  0  0  0  0  0  0  0  0  0  0  0
    2.3848    1.4084   -0.0131 C   0  0  0  0  0  0  0  0  0  0  0  0
    2.4009    0.0267   -0.0207 C   0  0  0  0  0  0  0  0  0  0  0  0
    1.2138   -0.6803   -0.0132 C   0  0  0  0  0  0  0  0  0  0  0  0
    0.0021   -0.0041    0.0020 C   0  0  0  0  0  0  0  0  0  0  0  0
   -0.0167    1.3821    0.0096 C   0  0  0  0  0  0  0  0  0  0  0  0
   -1.3312    2.1191    0.0199 C   0  0  0  0  0  0  0  0  0  0  0  0
   -1.8940    2.4295    1.8779 Br  0  0  0  0  0  0  0  0  0  0  0  0
    1.1605    3.4482    0.0099 O   0  0  0  0  0  0  0  0  0  0  0  0
    2.4264    4.1111    0.0014 C   0  0  0  0  0  0  0  0  0  0  0  0
   -1.1651   -0.7001    0.0099 O   0  0  0  0  0  0  0  0  0  0  0  0
   -1.0703   -2.1259    0.0013 C   0  0  0  0  0  0  0  0  0  0  0  0
  9 10  1  0      
  1  9  1  0      
 11 12  1  0      
  5 11  1  0      
  1  2  2  0      
  2  3  1  0      
  3  4  2  0      
  4  5  1  0      
  5  6  2  0      
  6  1  1  0      
  6  7  1  0      
  7  8  1  0      
M  STY  1   1 SUP
M  SLB  1   1   1
M  SAL   1  2   9  10
M  SBL   1  1   2
M  SMT   1 OMe
M  SBV   1   2    0.7144   -0.4125
M  STY  1   2 SUP
M  SLB  1   2   2
M  SAL   2  2  11  12
M  SBL   2  1   4
M  SMT   2 OMe
M  SBV   2   4   -0.7144   -0.4125
M  END
$$$$
