# Supplementary material
Source: MDPI journal article supplement (https://www.mdpi.com/search?q=molbank-2021-M1277)
Supplement: s002 [file molbank-2021-M1277-s002.inchi]

InChI=1S/C9H11BrO2/c1-11-8-4-3-5-9(12-2)7(8)6-10/h3-5H,6H2,1-2H3
AuxInfo=1/0/N:10,12,3,2,4,7,6,1,5,8,9,11/E:(1,2)(4,5)(8,9)(11,12)/rA:12CCCCCCCBrOCOC/rB:d1;s2;d3;s4;s1d5;s6;s7;s1;s9;s5;s11;/rC:-.6668,-.3849,0;-.6668,-1.9251,0;.6668,-2.6951,0;2.0003,-1.9251,0;2.0003,-.3849,0;.6668,.3849,0;.6668,1.9251,0;2.0003,2.6951,0;-2.0003,.3849,0;-3.3339,-.3849,0;3.3339,.3849,0;3.3339,1.9251,0;
